# Supplementary material
Source: publisher figshare collection journal article supplement (https://acs.figshare.com/ndownloader/files/3919570)
Supplement: Supplementary file 1 [file 3919570]

# Effect of pH-Responsive Alginate/Chitosan Multilayers Coating on Delivery Efficiency, Cellular Uptake and Biodistribution of Mesoporous Silica Nanoparticles Based Nanocarriers

*Wei Feng<sup>a,b, ‡</sup>, Wei Nie<sup>a, ‡</sup>, Chuanglong He<sup>a,b\*</sup>, Xiaojun Zhou<sup>b</sup>, Liang Chen<sup>a</sup>, Kexin Qiu<sup>b</sup>,  
Weizhong Wang<sup>a</sup>, Zhiqi Yin<sup>a</sup>*

<sup>a</sup> College of Chemistry, Chemical Engineering and Biotechnology, Donghua University,  
Shanghai 201620, China

<sup>b</sup> Key Laboratory for Modification of Chemical Fibers and Polymer Materials, Donghua  
University, Shanghai 201620, China

<sup>‡</sup>Contributed equally to this work.

\*Corresponding author.

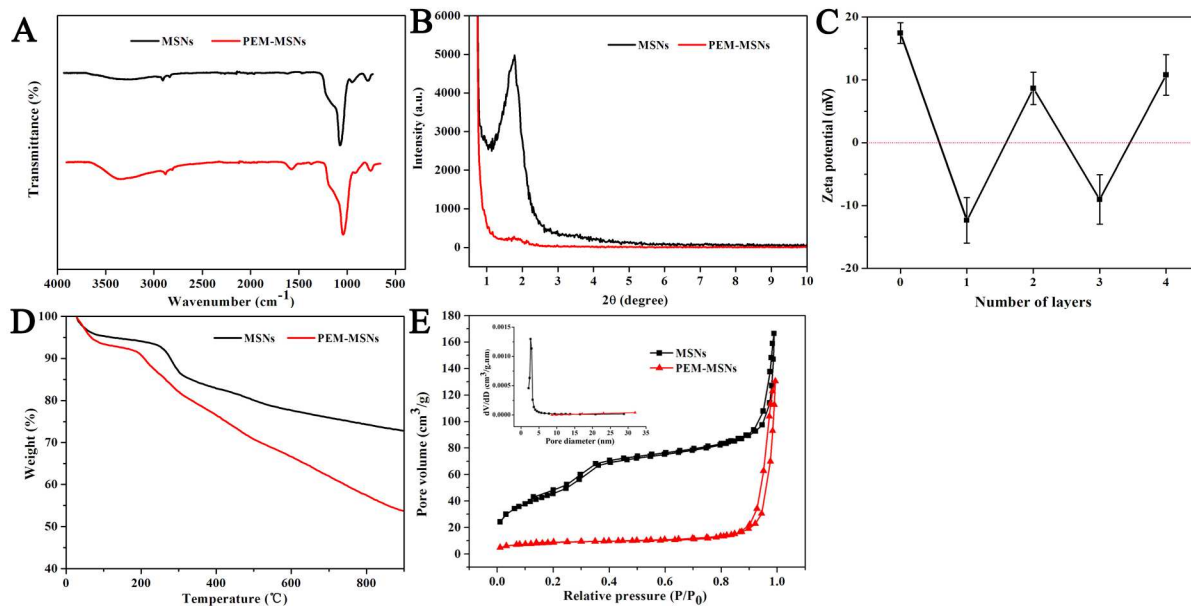

**Figure S1.** Characterization of the synthesized MSNs and PEM-MSNs. (A) FT-IR spectra, (B) XRD patterns, (C) Zeta potential changes in the process of coating polyelectrolyte layers, (D) TGA curves, (E) Nitrogen adsorption-desorption isotherms (inset is pore size distribution) of MSNs and PEM-MSNs.

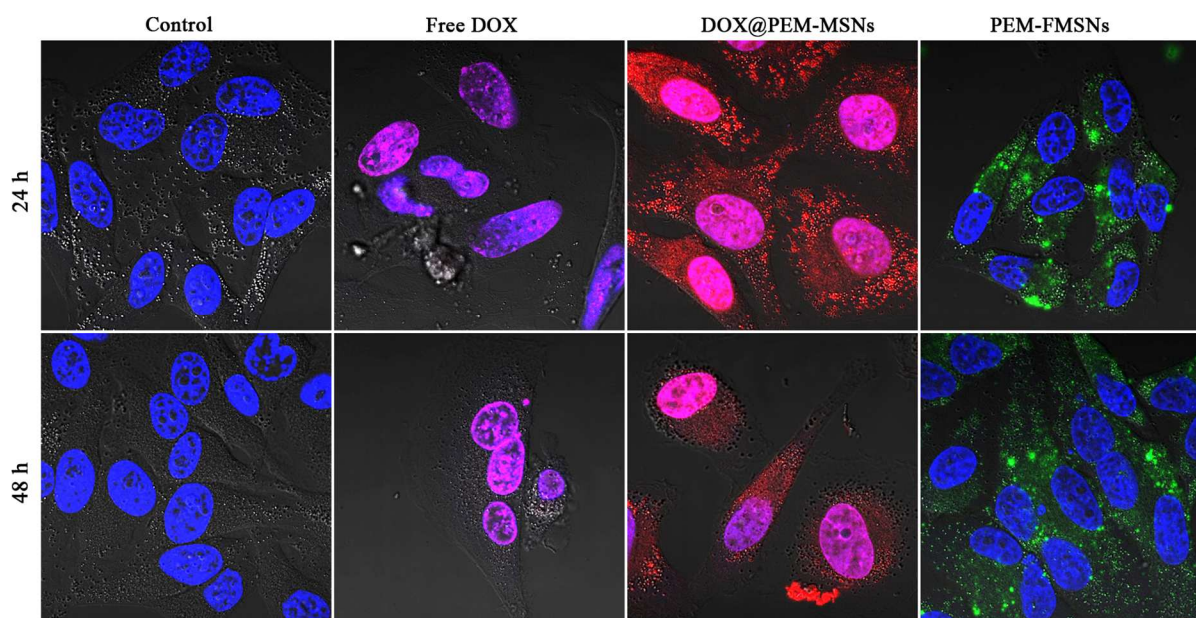

**Figure S2.** Confocal laser scanning microscopy images of HeLa cells, which were incubated with blank medium, free DOX, DOX@PEM-MSNs and PEM-FMSNs at DOX concentration of 1  $\mu\text{g}/\text{mL}$  and 37  $^{\circ}\text{C}$  for 24 and 48 h. DAPI was used for blue staining of the cell nuclei. Red fluorescence corresponds to the DOX (or DOX@PEM-MSNs). Green fluorescence represents PEM-FMSNs. Cells were imaged using a 63  $\times$  oil-immersion objective.
